# Supplementary material
Source: bioRxiv or medRxiv preprint supplement (https://www.biorxiv.org/highwire/filestream/20499/field_highwire_adjunct_files/0/074294-1.pdf)
Supplement: Supplementary file [file 074294-1.pdf]

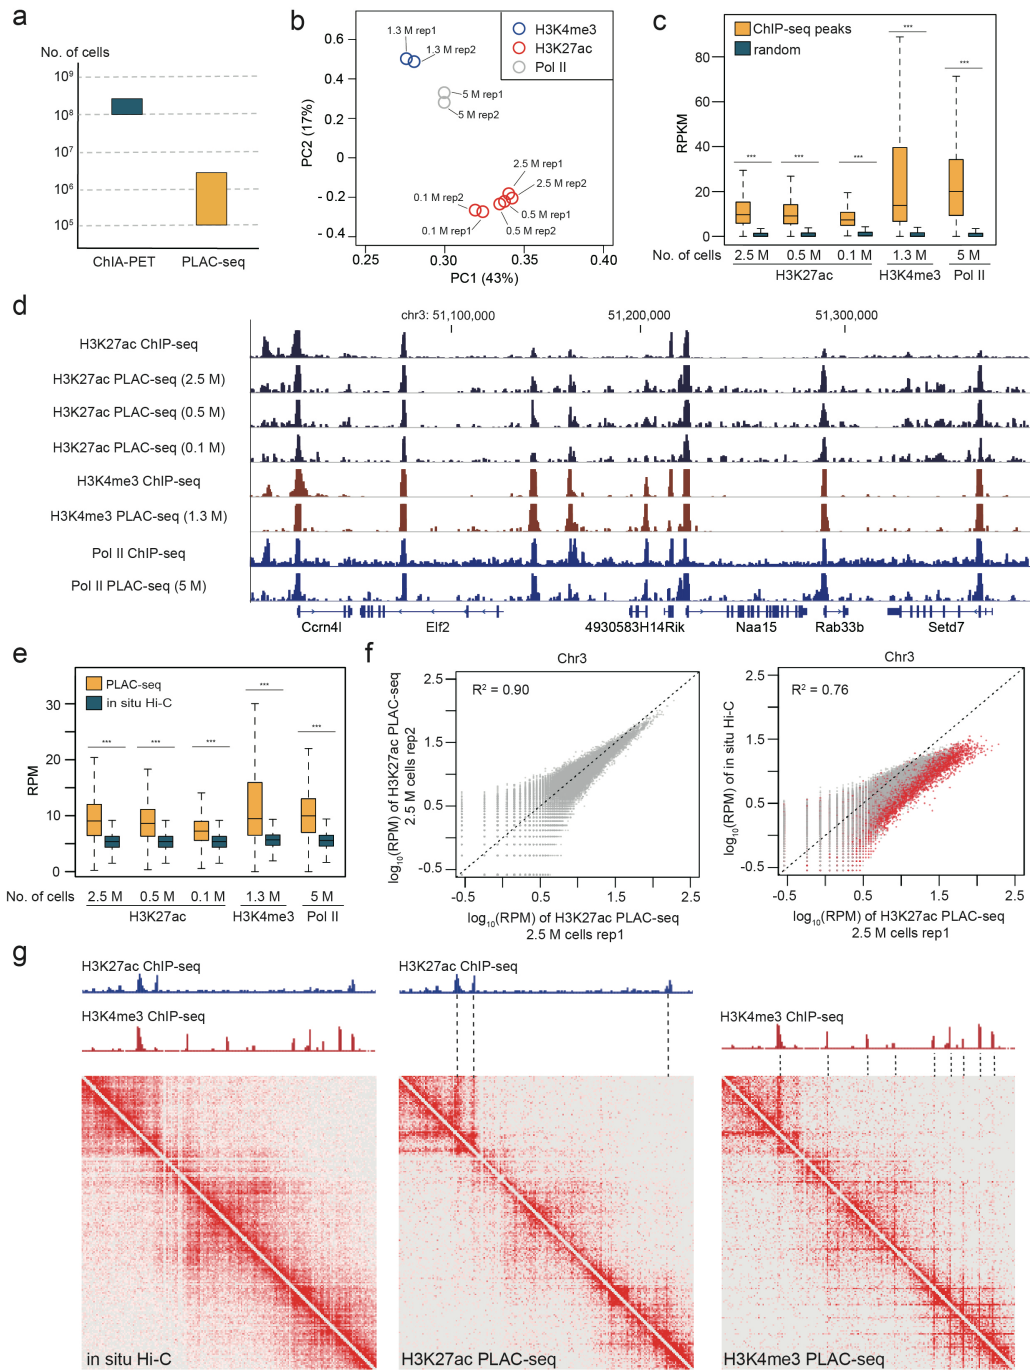

### Supplementary Figure 1 Development and validation of PLAC-seq.

(a) Comparison of input material requirement of PLAC-seq and ChIA-PET. (b) Principal component analysis (PCA) of short-range reads in different PLAC-seq experiments highlights the reproducibility between biological replicates. (c) Box plots of Reads Per Kilobase per Million reads (RPKM) calculated using PLAC-seq short-range *cis* pairs (distance < 1kb) suggest that PLAC-seq signals are significantly enriched in ChIP-seq peaks compared to randomly chosen regions (\*\*\*)Wilcoxon tests,  $P < 2.2e-16$ ). (d) The signals of short-range reads (< 1kb) from PLAC-seq were similar to those of ChIP-seq. (e) Box plots of reads per million (RPM) at ChIP-enriched regions for PLAC-seq and *in situ* Hi-C. Only long-range (>10kb) *cis* reads were considered (\*\*\*)Wilcoxon tests,  $P < 2.2e-16$ ). (f) Scatter plots of pair-wise interaction frequency on chromosome 3. Left, PLAC-seq biological replicates were highly reproducible ( $R^2=0.90$ ); right, interaction intensity is skewed towards PLAC-seq for fragments with H3K27ac ChIP-seq peaks comparing to *in situ* Hi-C ( $R^2=0.76$ ). (Red dots represent fragment pairs with at least one end bound by H3K27ac) (g) Example of long-range *cis* reads enrichment in H3K27ac, H3K4me and Pol II PLAC-seq compared to *in situ* Hi-C (visualized by Juicebox).

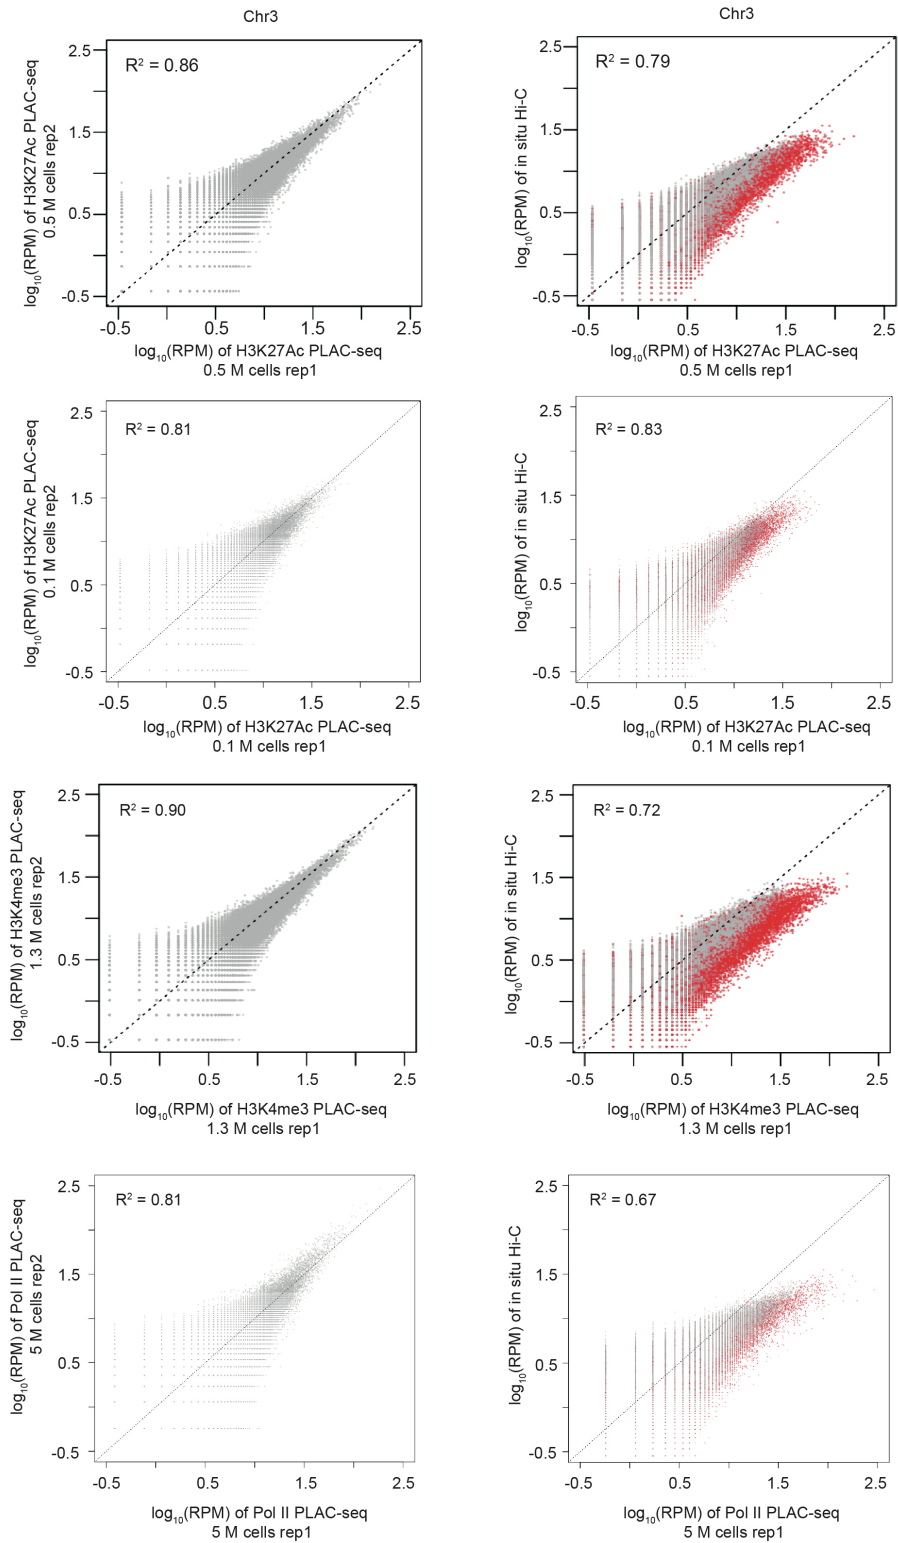

### Supplementary Figure 2

Scatter plots of interaction intensity between PLAC-seq biological replicates (left panels) and between PLAC-seq and *in situ* Hi-C (right panels) on chromosome 3. (Red dots represent fragment pairs bound by corresponding ChIP-seq peaks)

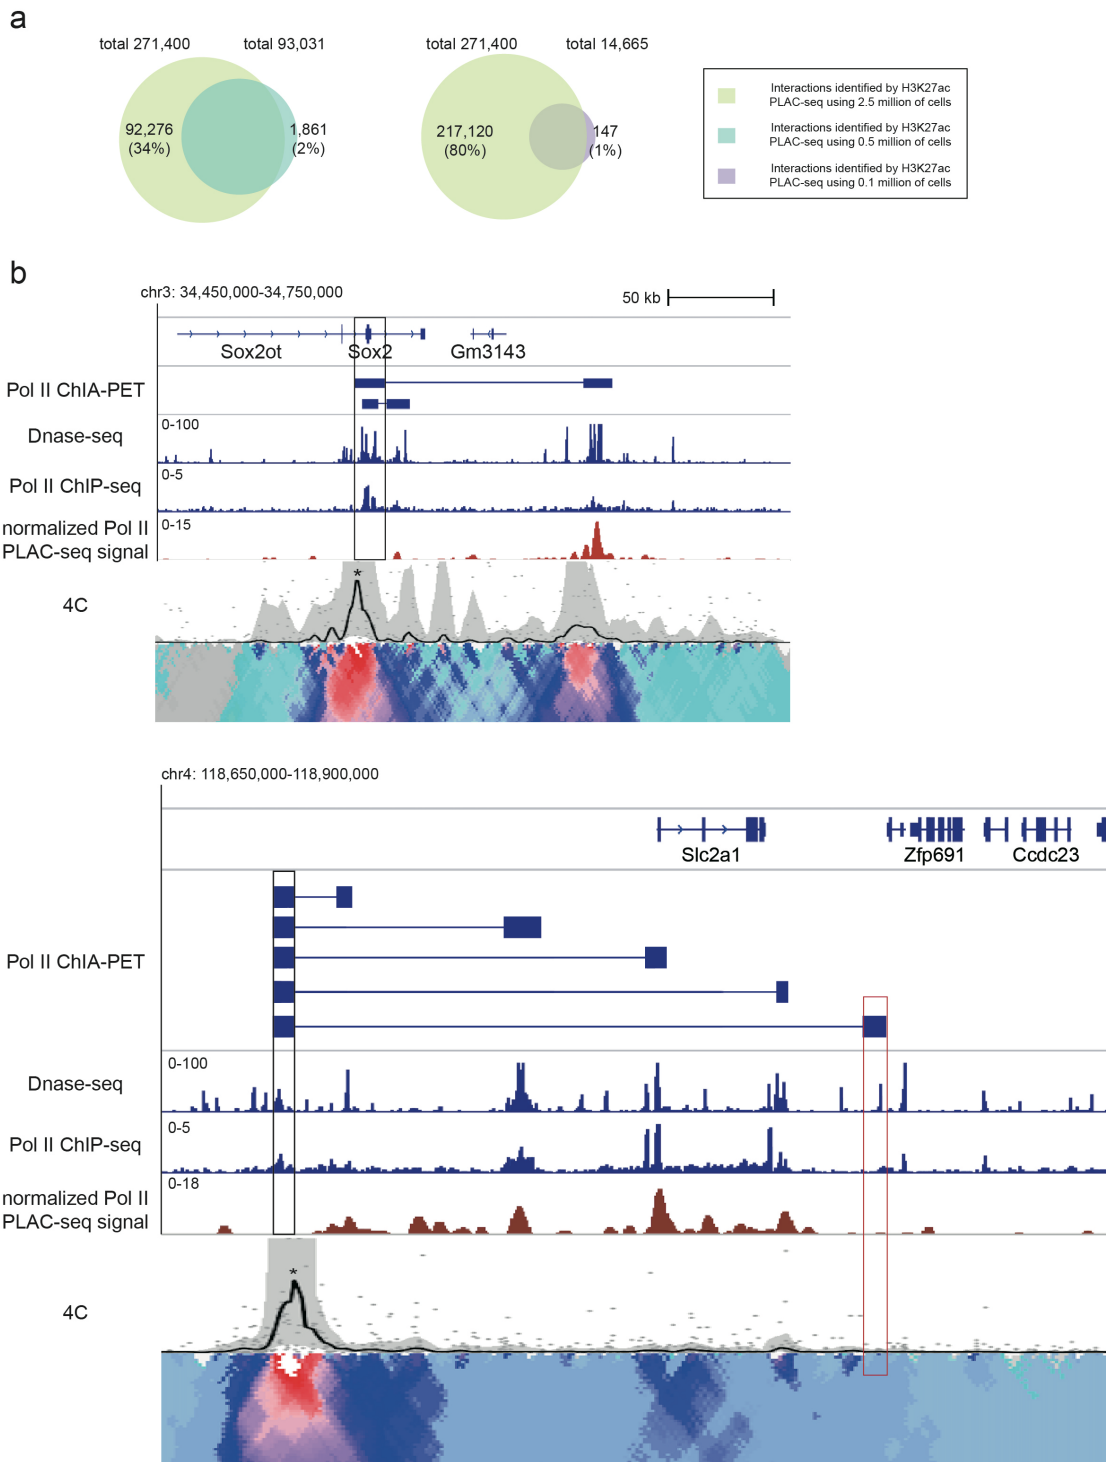

**Supplementary Figure 3. Validation of PLAC-seq data by 4C-seq.**

(a) Long-range interactions identified by H3K27ac PLAC-seq are reproducible using different number of cells. (b) Comparison of 4C, PLAC-seq, ChIA-PET results on the selected locus. (4C anchor points are marked by asterisk while PLAC-seq and ChIA-PET anchor regions are marked by black rectangle; red rectangle highlights chromatin interaction uniquely detected by ChIA-PET but not observed from 4C-seq).

Supplementary Table 1. Summary of 4C experiments

| Sample No. | Anchor point                  | 1st digestion enzyme | 2nd digestion enzyme | PCR primer (forward)                                  | PCR primer (reverse)                                           | Figure related                      |
|------------|-------------------------------|----------------------|----------------------|-------------------------------------------------------|----------------------------------------------------------------|-------------------------------------|
| 4C_1       | Chr3: 34,545,849-34,546,065   | Csp6I                | NlaIII               | TCCCTACACGACGCTC<br>TTCCGATCTATTGCCTC<br>TGATAAGTAC   | GTGACTGGAGTTCAGACG<br>TGTGCTCTTCCGATCTATG<br>ACAGCCCCAGCCCAT   | Supplementary Fig. 2<br>upper panel |
| 4C_2       | Chr1: 72,261,052-72,261,738   | DpnII                | Csp6I                | TCCCTACACGACGCTC<br>TTCCGATCTAGACAAGC<br>CTCAGTTGGATC | GTGACTGGAGTTCAGACG<br>TGTGCTCTTCCGATCTATC<br>CCAAGGCTACATCATA  | Fig. 1j, left                       |
| 4C_3       | Chr5: 110,901,207-110,901,593 | DpnII                | Csp6I                | TCCCTACACGACGCTC<br>TTCCGATCTGGGAGTC<br>ATGGAAACTGATC | GTGACTGGAGTTCAGACG<br>TGTGCTCTTCCGATCTTIG<br>ATAGTAACAAGGCCCC  | Fig. 1j, right                      |
| 4C_4       | Chr4: 118,684,035-118,684,927 | DpnII                | Csp6I                | TCCCTACACGACGCTC<br>TTCCGATCTATTCTTCT<br>TCTGAAAGGATC | GTGACTGGAGTTCAGACG<br>TGTGCTCTTCCGATCTATT<br>TTAGCGGAAGACTCACA | Supplementary Fig. 2<br>lower panel |
